# Supplementary material for: Pyridine-substituted nitronyl nitroxide biradicals: a triplet (S = 1) ground state lasting out N-methylation
Source: Royal Society of Chemistry journal article supplement (doi:10.1039/b609760j), 2006-01-01
Supplement: b609760j.pdf [file b609760j.pdf]

Supplementary Data:

Pyridine-Substituted Nitronyl Nitroxide Biradicals: A Triplet ( $S = 1$ ) Ground State Lasting out  
*N*-Methylation

5 **Kenichi Hayakawa,<sup>a</sup> Daisuke Shiomi,<sup>\*a,b</sup> Tomoaki Ise,<sup>a,b</sup> Kazunobu Sato,<sup>a</sup> and Takeji Takui<sup>\*a</sup>**

<sup>a</sup> Departments of Materials Science and Chemistry, Graduate School of Science, Osaka City University, Sumiyoshi-ku, Osaka 558-8585, Japan, and <sup>b</sup> PRESTO, Japan Science and Technology Agency (JST), 10 Honcho Kawaguchi, Saitama 332-0012, Japan

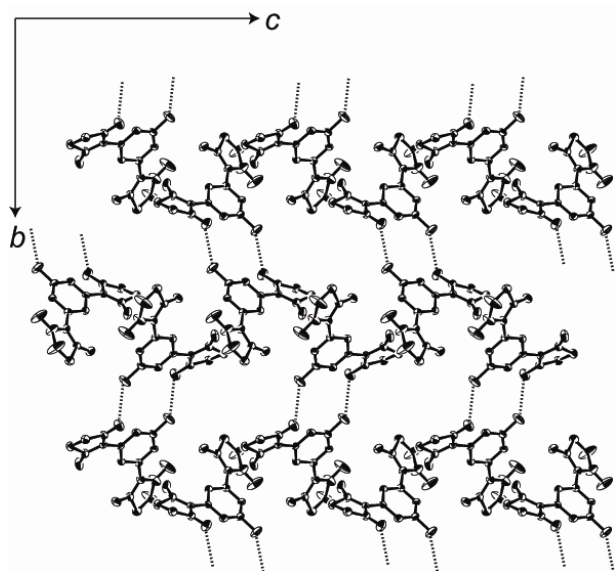

**Fig. 1S** Molecular packing of  $2^+$  in the  $bc$  plane. The dashed lines represent the intermolecular contact with the O2-C20 distance of 3.066(5) Å. The methyl groups of nitronylnitroxide and the hydrogen atoms are omitted for clarity.

(a)

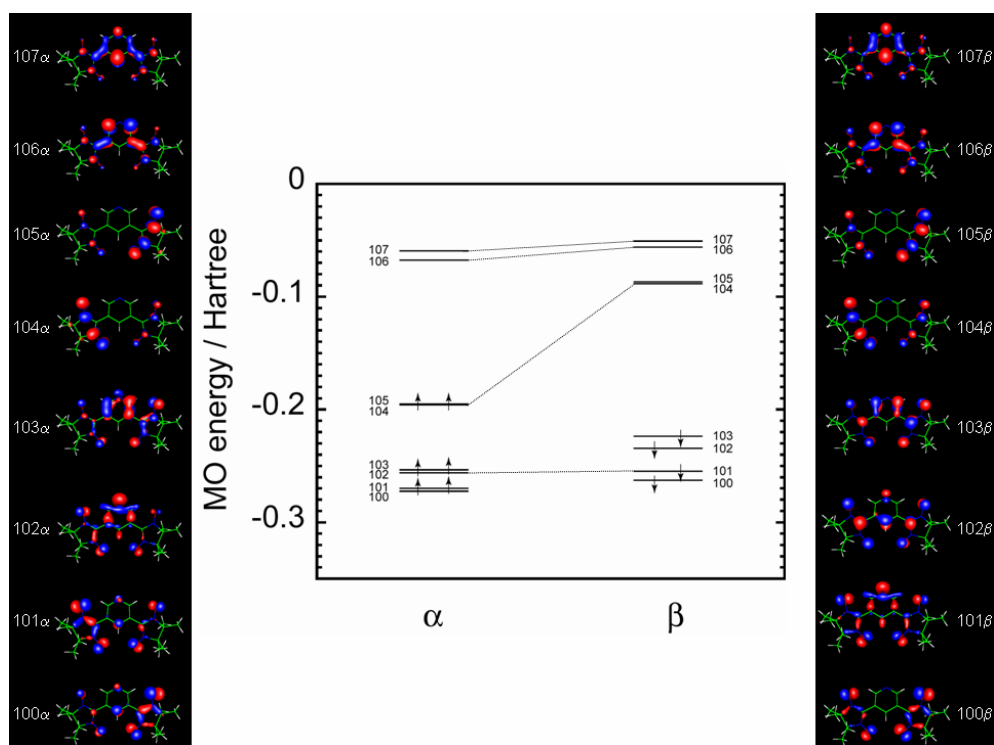

(b)

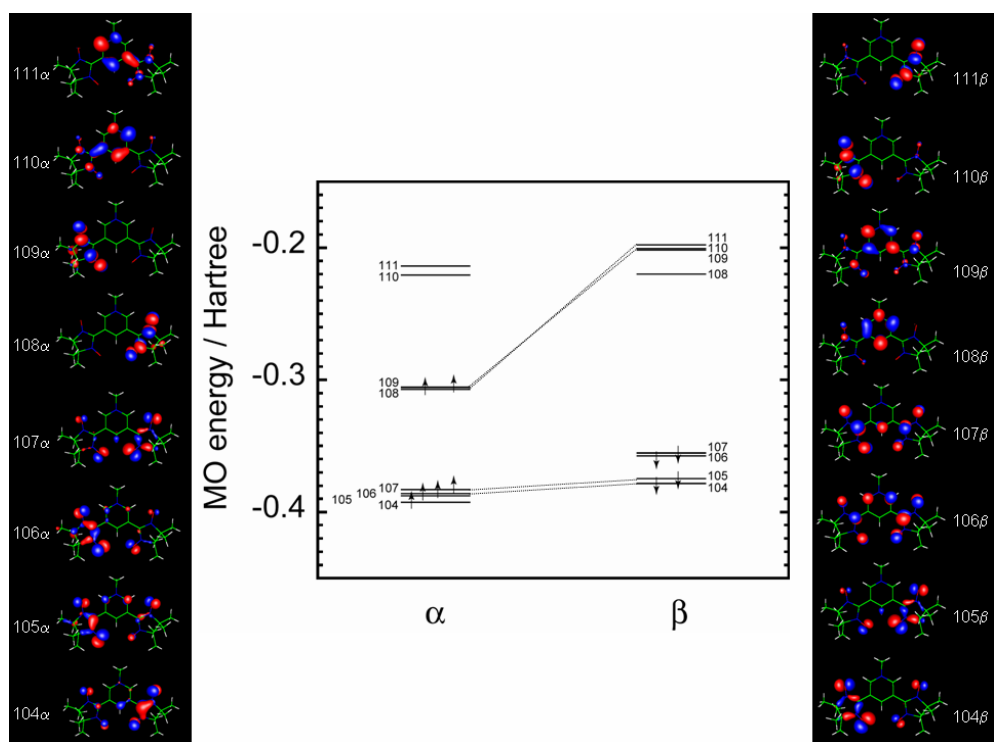

15

**Fig. 2S** Energies and orbital pictures of the topmost occupied and low-lying unoccupied orbitals for the neutral biradical **1A** (a) and the cation **2<sup>+</sup>** (b) calculated by the DFT method. The  $\alpha$  orbitals are combined by the dashed lines with the  $\beta$  orbitals of the same symmetry. The electronic configuration of the triplet ground state is depicted by the arrows.

20 **Table 1S** Atomic spin densities  $\rho$  of the biradical **1** calculated at UB3LYP/6-31+G(d,p) level.<sup>a</sup>

| <b>1A</b> |           |      |           | <b>1B</b> |           |      |           |
|-----------|-----------|------|-----------|-----------|-----------|------|-----------|
| Atom      | $\rho$    | Atom | $\rho$    | Atom      | $\rho$    | Atom | $\rho$    |
| N1        | 0.032504  | O3   | 0.332985  | N6        | 0.033014  | O7   | 0.329222  |
| 25 C1     | -0.073596 | O4   | 0.326429  | C20       | -0.071037 | O8   | 0.333779  |
| C2        | 0.049629  | N4   | 0.299077  | C21       | 0.068097  | N9   | 0.294688  |
| C3        | -0.070092 | N5   | 0.290230  | C22       | -0.071979 | N10  | 0.287988  |
| C4        | 0.053792  | C13  | -0.218368 | C23       | 0.043406  | C32  | -0.212567 |
| C5        | -0.070963 | C14  | -0.003413 | C24       | -0.075673 | C33  | -0.004854 |
| 30 H1     | 0.003184  | C15  | -0.007185 | H28       | 0.003405  | C34  | -0.007603 |
| H2        | 0.002710  | C16  | 0.014663  | H29       | 0.002643  | C35  | -0.000727 |
| H3        | 0.003626  | C17  | -0.005838 | H30       | 0.003175  | C36  | 0.008046  |
| O1        | 0.321678  | C18  | -0.004610 | O5        | 0.342267  | C37  | 0.011259  |
| O2        | 0.339274  | C19  | 0.016641  | O6        | 0.317346  | C38  | -0.002198 |
| 35 N2     | 0.292764  | H16  | 0.001113  | N7        | 0.307609  | H43  | -0.000340 |
| N3        | 0.298932  | H17  | -0.000959 | N8        | 0.278528  | H44  | -0.000438 |
| C6        | -0.220537 | H18  | -0.001091 | C25       | -0.218009 | H45  | 0.000141  |
| C7        | 0.003051  | H19  | -0.000369 | C26       | -0.012716 | H46  | -0.000496 |
| C8        | -0.018630 | H20  | -0.000200 | C27       | -0.001365 | H47  | 0.000082  |
| 40 C9     | -0.005008 | H21  | -0.000535 | C28       | 0.012936  | H48  | -0.000449 |
| C10       | 0.014431  | H22  | -0.000405 | C29       | -0.002573 | H49  | -0.000467 |
| C11       | 0.017820  | H23  | -0.000606 | C30       | -0.002477 | H50  | -0.000046 |
| C12       | -0.005506 | H24  | -0.000184 | C31       | 0.011913  | H51  | -0.000442 |
| H4        | -0.000593 | H25  | -0.001119 | H31       | -0.000330 | H52  | -0.000322 |
| 45 H5     | -0.000164 | H26  | 0.000634  | H32       | -0.000515 | H53  | -0.000427 |
| H6        | -0.000380 | H27  | -0.000858 | H33       | 0.000541  | H54  | 0.000053  |
| H7        | -0.001177 |      |           | H34       | -0.000476 |      |           |
| H8        | -0.000914 |      |           | H35       | -0.000404 |      |           |
| H9        | 0.000675  |      |           | H36       | 0.000254  |      |           |
| 50 H10    | -0.000932 |      |           | H37       | -0.000310 |      |           |
| H11       | -0.001142 |      |           | H38       | 0.000065  |      |           |
| H12       | 0.000654  |      |           | H39       | -0.000338 |      |           |
| H13       | -0.000176 |      |           | H40       | -0.000033 |      |           |
| H14       | -0.000368 |      |           | H41       | -0.000407 |      |           |
| 55 H15    | -0.000578 |      |           | H42       | -0.000440 |      |           |

<sup>a</sup>The atom numbering scheme is given in Scheme 1S.

**Table 2S** Atomic spin densities  $\rho$  of the biradical  $2^+$  calculated at UB3LYP/6-31+G(d,p) level.<sup>a</sup>

| 60     |           |      |           |
|--------|-----------|------|-----------|
| Atom   | $\rho$    | Atom | $\rho$    |
| N1     | 0.031086  | O3   | 0.331949  |
| C1     | -0.086977 | O4   | 0.323624  |
| C2     | 0.041397  | N4   | 0.282446  |
| 65 C3  | -0.086072 | N5   | 0.296262  |
| C4     | 0.055215  | C13  | -0.208426 |
| C5     | -0.052939 | C14  | -0.015999 |
| H1     | 0.004097  | C15  | -0.000427 |
| H2     | 0.002791  | C16  | 0.020828  |
| 70 H3  | 0.002877  | C17  | -0.005133 |
| O1     | 0.349388  | C18  | -0.020805 |
| O2     | 0.322398  | C19  | 0.044244  |
| N2     | 0.282528  | H16  | -0.000441 |
| N3     | 0.296188  | H17  | -0.000508 |
| 75 C6  | -0.214563 | H18  | -0.000532 |
| C7     | -0.009670 | H19  | -0.000606 |
| C8     | 0.005044  | H20  | -0.000628 |
| C9     | -0.004060 | H21  | 0.000500  |
| C10    | 0.011176  | H22  | 0.001598  |
| 80 C11 | 0.007984  | H23  | -0.000866 |
| C12    | 0.002016  | H24  | -0.000857 |
| H4     | -0.000378 | H25  | -0.001443 |
| H5     | -0.000514 | H26  | -0.000529 |
| H6     | 0.000167  | H27  | -0.001313 |
| 85 H7  | -0.000326 | C20  | -0.001091 |
| H8     | 0.000018  | H28  | 0.000163  |
| H9     | -0.000405 | H29  | 0.000218  |
| H10    | 0.000090  | H30  | 0.000952  |
| H11    | -0.000448 |      |           |
| 90 H12 | -0.000585 |      |           |
| H13    | -0.000271 |      |           |
| H14    | -0.000022 |      |           |
| H15    | -0.000411 |      |           |

<sup>a</sup>The atom numbering scheme is given in Scheme 1S.
